# Supplementary material for: Reproductive history and blood cell telomere length
Source: publisher site journal article supplement (doi:10.18632/aging.101558), 2018-09-19
Supplement: Supplementary file [file aging-v10i9-101558-supplementary-material-SD1.pdf]

**SUPPLEMENTARY TABLES**

**Supplementary Table 1. Associations between reproductive history and relative telomere length among women who remained cancer free through September 2016 (n= 664).**

|                                        | Individual models    |         | Mutually adjusted model |         |
|----------------------------------------|----------------------|---------|-------------------------|---------|
|                                        | $\beta$ (95% CI)     | p-value | $\beta$ (95% CI)        | p-value |
| Reproductive period (per 5 yrs.)       | -0.014 (-0.03, 0.00) | 0.13    | -0.022 (-0.04, -0.00)   | 0.04    |
| Parity (per birth)                     | -0.008 (-0.03, 0.01) | 0.46    | -0.018 (-0.04, 0.00)    | 0.11    |
| Menopause status (pre- vs post)        | -0.054 (-0.13, 0.02) | 0.18    | -0.058 (-0.14, 0.02)    | 0.15    |
| Breastfeeding (per yr.)                | 0.016 (-0.00, 0.04)  | 0.12    | 0.026 (0.00, 0.05)      | 0.02    |
| BC pill use (per 10 yrs.)              | -0.003 (-0.04, 0.04) | 0.87    | 0.004 (-0.04, 0.05)     | 0.86    |
| Hormone use (per 10 yrs.) <sup>1</sup> | -0.018 (-0.06, 0.02) | 0.40    | -0.026 (-0.07, 0.02)    | 0.29    |

Models adjusted for age at blood draw (yrs.) and race (White, Black, Hispanic, Other), and paternal age (yrs.)

Abbreviation: birth control, BC

<sup>1</sup>Model restricted to postmenopausal women (n= 412)

**Supplementary Table 2. Examining the impact of restriction to White women for the associations between reproductive histories and relative telomere length, separate models (n= 1,048).**

|                                        | Original adjusted models<br>n= 1,048 |         | Restricted to White women<br>n= 965 |         |
|----------------------------------------|--------------------------------------|---------|-------------------------------------|---------|
|                                        | Individual models                    |         |                                     |         |
|                                        | $\beta$ (95% CI)                     | p-value | $\beta$ (95% CI)                    | p-value |
| Reproductive period (per 5 yrs.)       | -0.015 (-0.03, 0.00)                 | 0.051   | -0.012 (-0.03, 0.00)                | 0.131   |
| Parity (per birth)                     | -0.007 (-0.02, 0.01)                 | 0.404   | -0.005 (-0.02, 0.01)                | 0.583   |
| Menopause status (pre- vs post)        | -0.052 (-0.12, 0.01)                 | 0.113   | -0.042 (-0.11, 0.03)                | 0.230   |
| Breastfeeding (per yr.)                | 0.017 (-0.00, 0.03)                  | 0.056   | 0.019 (0.00, 0.04)                  | 0.042   |
| BC pill use (per 10 yrs.)              | 0.009 (-0.02, 0.04)                  | 0.621   | 0.010 (-0.03, 0.05)                 | 0.570   |
| Hormone use (per 10 yrs.) <sup>1</sup> | 0.003 (-0.03, 0.04)                  | 0.860   | -0.000 (-0.04, 0.04)                | 0.988   |
|                                        | Mutually adjusted models             |         |                                     |         |
| Reproductive period (per 5 yrs.)       | -0.019 (-0.04, -0.00)                | 0.030   | -0.017 (-0.04, 0.00)                | 0.059   |
| Parity (per birth)                     | -0.016 (-0.03, 0.00)                 | 0.071   | -0.015 (-0.03, 0.00)                | 0.114   |
| Menopause status (pre- vs post)        | -0.051 (-0.12, 0.01)                 | 0.126   | -0.044 (-0.11, 0.02)                | 0.210   |
| Breastfeeding (per yr.)                | 0.027 (0.01, 0.05)                   | 0.005   | 0.029 (0.01, 0.05)                  | 0.005   |
| BC pill use (per 10 yrs.)              | 0.015 (-0.02, 0.05)                  | 0.381   | 0.018 (-0.02, 0.05)                 | 0.341   |
| Hormone use (per 10 yrs.) <sup>1</sup> | -0.008 (-0.05, 0.03)                 | 0.688   | -0.011 (-0.05, 0.03)                | 0.590   |

“Original adjusted models” include age at blood draw (yrs.), race/ethnicity (White, Black, Hispanic, Other), and paternal age (yrs.). “Restriction to White women” models include age at blood draw (yrs.) and paternal age (yrs.)

Abbreviation: birth control, BC

<sup>1</sup>Model restricted to postmenopausal women (n= 654 in the full analyses; n= 606 after restriction to White women)

**Supplementary Table 3. Mutually adjusted models for associations between reproductive history and relative telomere length (n= 597).**

|                                        | Model 1              |         | Model 2              |         |
|----------------------------------------|----------------------|---------|----------------------|---------|
|                                        | $\beta$ (95% CI)     | p-value | $\beta$ (95% CI)     | p-value |
| Reproductive period (per 5 yrs.)       | 0.009 (-0.01, 0.03)  | 0.29    | 0.006 (-0.01, 0.02)  | 0.50    |
| Parity (per birth)                     | -0.002 (-0.02, 0.01) | 0.77    | -0.002 (-0.02, 0.01) | 0.77    |
| Breastfeeding (per yr.)                | -0.010 (-0.03, 0.01) | 0.32    | -0.013 (-0.03, 0.01) | 0.22    |
| Menopause status (pre- vs post)        | 0.006 (-0.05, 0.06)  | 0.85    | -0.004 (-0.06, 0.06) | 0.90    |
| BC pill use (per 10 yrs.)              | -0.003 (-0.03, 0.03) | 0.86    | -0.001 (-0.03, 0.03) | 0.93    |
| Hormone use (per 10 yrs.) <sup>1</sup> | 0.012 (-0.02, 0.05)  | 0.51    | 0.011 (-0.03, 0.05)  | 0.56    |

Model 1 adjusted for age at blood draw (yrs.), race (White, Black, Hispanic, Other), and paternal age (yrs.)

Model 2 additionally adjusted for the oversampled characteristics (perceived stress, continuous; smoking status, current/former/never)

Abbreviation: birth control, BC

<sup>1</sup>Model restricted to postmenopausal women (n= 358)
